# Supplementary material
Source: PubMed Central journal article supplement (PMC3117187)
Supplement: mmc1.pdf [file mmc1.pdf]

# Supplemenatry material:

Striated acto-myosin fibers can re-organize and register in response to elastic interactions with the matrix

B.M. Friedrich, A. Buxboim, D.E. Discher, S.A. Safran

## 1 Derivation of strain field induced by striated fiber – equation (2)

A localized point force  $F_j\delta(\mathbf{x}')$  acting tangential to an elastic half-space generates a displacement field  $u_i(\mathbf{x}) = G_{ij}(\mathbf{x} - \mathbf{x}')F_j$  with a corresponding strain field  $u_{ij} = (\partial_i u_j + \partial_j u_i)/2$  where

$$G_{ij} = (1 + \nu)/(\pi E_m) [(1 - \nu)\delta_{ij}/|x| + \nu x_i x_j/|x|^3] \quad (\text{S1})$$

is the Boussinesq Green's function for the elastic half space. By differentiation, we obtain the strain field due to a single point force dipole  $P_{ij}\delta(\mathbf{x}')$  as  $u_{ij} = -\partial_l(\partial_j G_{ik} + \partial_i G_{jk})P_{kl}/2$ . This is the “building block” for the total strain field of a striated fiber: the parallel component of the strain field induced by the dipole density  $\Pi_{ij}$  is given by a convolution of the density with this Green's function as  $u_{11}(x, y) = -\int_{-\infty}^{\infty} dx' \partial_x'^2 G_{11}(x - x', y)\rho(x')$ . In Fourier space, this relation becomes a multiplication  $\tilde{u}_{11}(q, y) = -(iq)^2 \tilde{G}_{11}(q, y)\tilde{\rho}(q)$  where  $\tilde{G}_{11}(q, y)$  is the Fourier transform of the Green's function with respect to the  $x$ -coordinate

$$\begin{aligned} \tilde{G}_{11}(q, y) &= \int G_{11}(x, y) \exp(-iqx) dx \\ &= 2(1 + \nu)/(\pi E_m) [(1 - \nu)K_0(q|y|) + \nu(i\partial_q)^2(q/|y|)K_1(q|y|)]. \end{aligned} \quad (\text{S2})$$

We find  $\tilde{G}_{11}(0, y) = 0$ , hence the  $q = 0$  Fourier component of the strain field is always zero irrespective of the mean dipole density  $\rho_0$ . Note  $2\tilde{\rho}(q) = \rho_0\delta(q) + \rho_1\delta(q - q_0)$ . Now eq. 2 follows with a response factor  $\Phi$  that is essentially given by the Fourier transform of the Green's function evaluated at the principal wave length  $q_0 = 2\pi/a$  of a striated fiber,  $\Phi(y/a) = 2\pi^2 E_m \tilde{G}_{11}(q_0 y)$ . More explicitly,

$$\Phi(Y) = 2\pi(1 + \nu) [(1 - \nu)K_0(2\pi Y) - \nu\partial_Y^2 Y K_1(2\pi Y)/(2\pi)]. \quad (\text{S3})$$

Here  $Y = y/a$  and  $K_n$  denote the modified (hyperbolic) Bessel functions of the second kind. For sake of completeness, we also report the result for the case that the dipole density  $\rho(x)$  is acting inside the bulk of an extended elastic material (as a minimal model of a compliant cytoskeleton surrounding the fiber) instead of on the surface of an elastic half space (the substrate). In this case, eq. 2 holds with a modified propagation factor,  $\Phi_{3d}(Y) = (2\pi/8)(1 + \nu)/(1 - \nu)[(3 - 4\nu)K_0(2\pi Y) - \partial_Y^2 Y K_1(2\pi Y)/(2\pi)]$ , that shows similar functional dependence on  $Y$  and  $\nu$  as  $\Phi(Y)$ .

## 2 Variable Z-body size

For pedagogical reasons, we presented our theory only for the principal Fourier mode of the force dipole density induced by a striated fiber, assuming  $\rho(x) = \rho_0 + \rho_1 \cos(2\pi x/a)$ . This simplification corresponds to the assumption of an effective size of the crosslinking band of about half a sarcomer size  $a/2$ . Our theory can be generalized in a straight-forward manner to the case of variable Z-body sizes. To be more specific, we can write the dipole density  $\rho(x)$  as a periodic series of peaks of width  $\sigma$

$$\rho(x) = \sum_n \frac{1}{\sqrt{2\pi\sigma^2}} \exp\left[-\frac{(x-na)^2}{2\sigma^2}\right]. \quad (\text{S4})$$

The corresponding Fourier transformed force dipole density reads  $\tilde{\rho}(q) = \sum_n \exp[-q^2\sigma^2/2] \delta(q - nq_0)$ , and the strain field is given by a superposition of harmonic contributions,

$$u_{11}(x, y) = \frac{2}{E_m a^2} \sum_n \Phi(ny/a) \exp[-(2\pi n\sigma/a)^2/2] \cos(2\pi nx/a). \quad (\text{S5})$$

A similar formula is then derived for the elastic interaction energy  $W_{\text{int}} = \int u_{11}(x, d)\rho(x + \Delta x)$  (using the orthogonality relation for the cosine), which thus generalizes eq. 6. For values  $\sigma > 0.2a$ , this interaction energy is almost indistinguishable from the simple case studied in the main text. For smaller values of sigma (i.e. if Z-bodies are more localized), simulations show that elastic interactions drive smectic order even more effectively. Additionally, the minimal lateral fiber spacing  $d^*(\sigma)$ , above which inter-fiber registry is favored by elastic interactions, decreases, if smaller values for  $\sigma$  are chosen. In the limiting case  $\sigma \rightarrow 0$ , inter-fiber registry is favorable for all fiber spacings  $d$ , see also (25).
